# Supplementary material for: Study of the Durability of Membrane Electrode Assemblies in Various Accelerated Stress Tests for Proton-Exchange Membrane Water Electrolysis
Source: MDPI journal article supplement (doi:10.3390/ma17061331), 2024-03-14
Supplement: s1 [file s1]

# Study of the Durability of Membrane Electrode Assemblies in Various Accelerated Stress Tests for Proton-Exchange Membrane Water Electrolysis

Zhengquan Su <sup>1,2</sup>, Jun Liu <sup>2,\*</sup>, Pengfei Li <sup>2</sup> and Changhao Liang <sup>2</sup>

<sup>1</sup> Institute of Physical Science and Information Technology, Anhui University, Hefei 230601, China

<sup>2</sup> Key Laboratory of Materials Physics, Anhui Key Laboratory of Nanomaterials and Nanotechnology, Institute of Solid State Physics, Chinese Academy of Sciences, Hefei 230031, China

\* Correspondence: jliu@issp.ac.cn; Tel.: +86-55165591320; Tel./Fax: +86-55165591434

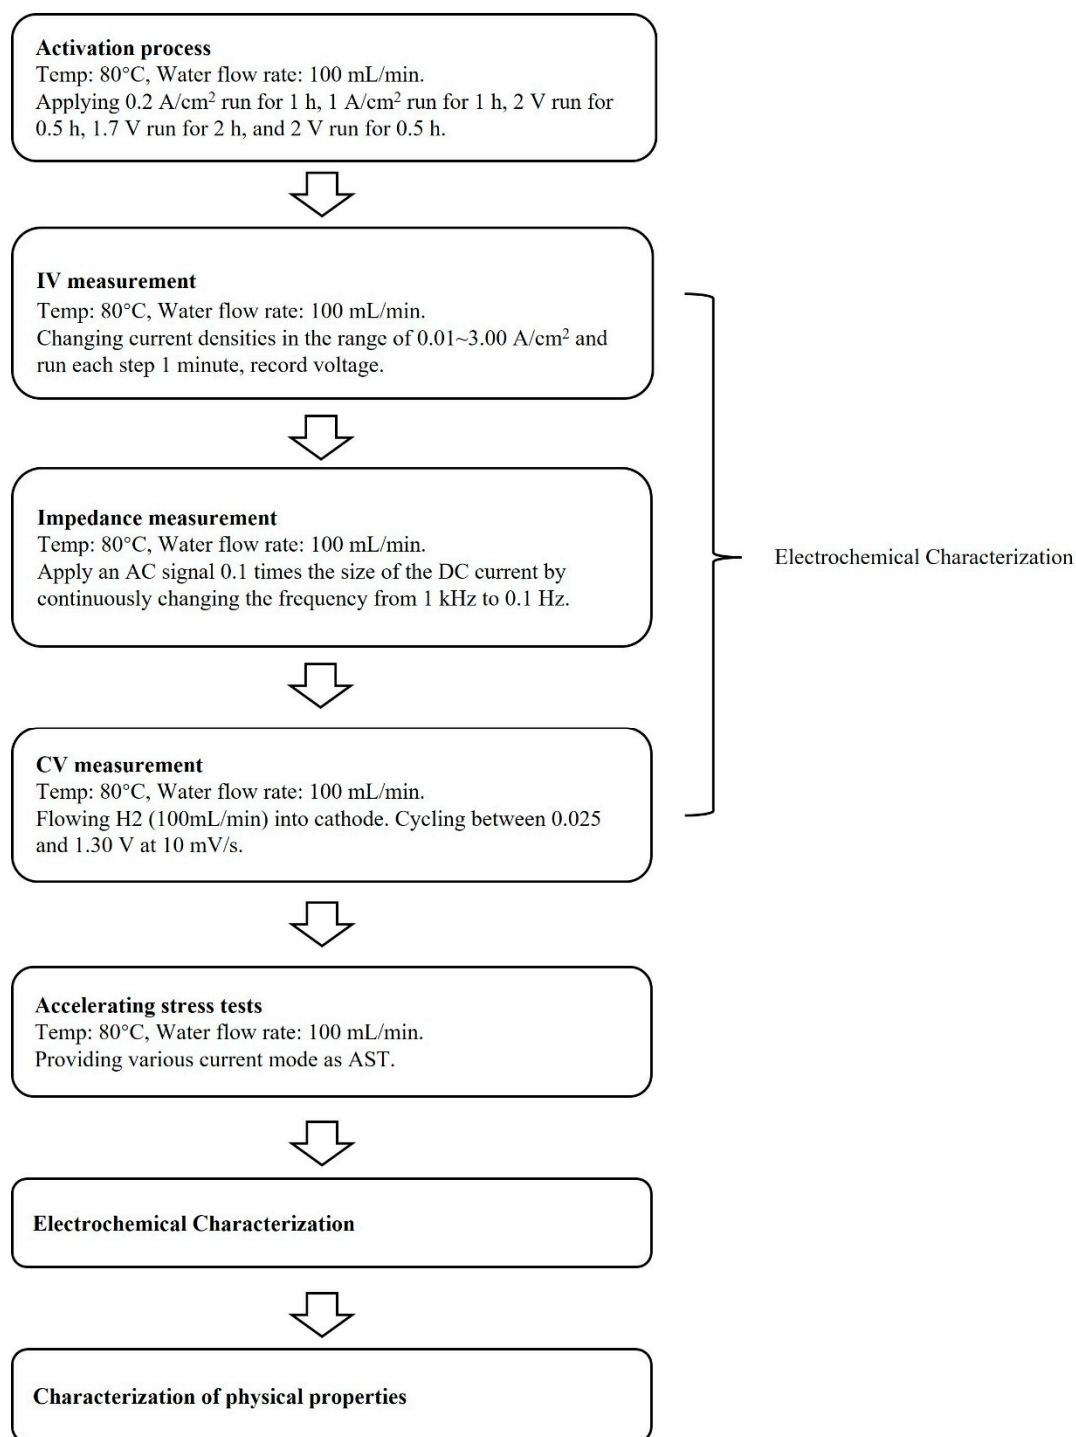

**Figure S1.** A graphical outline of accelerated stress tests.

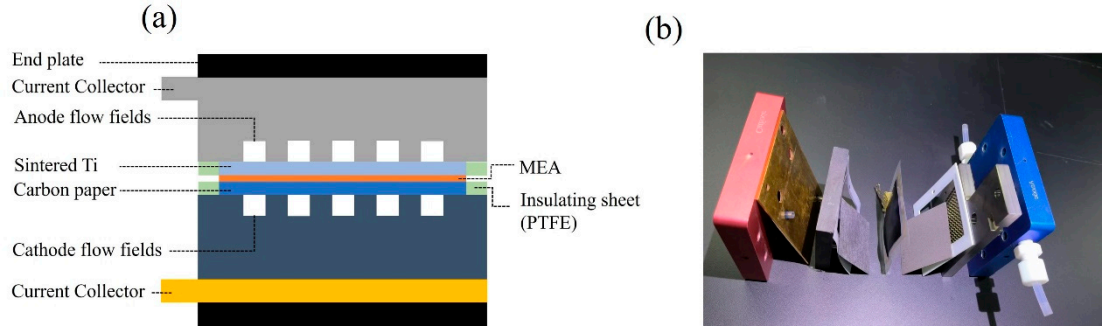

**Figure S2.** (a) Schematic diagram of the structure and (b) exploded view of the electrolyzer used in the investigation.

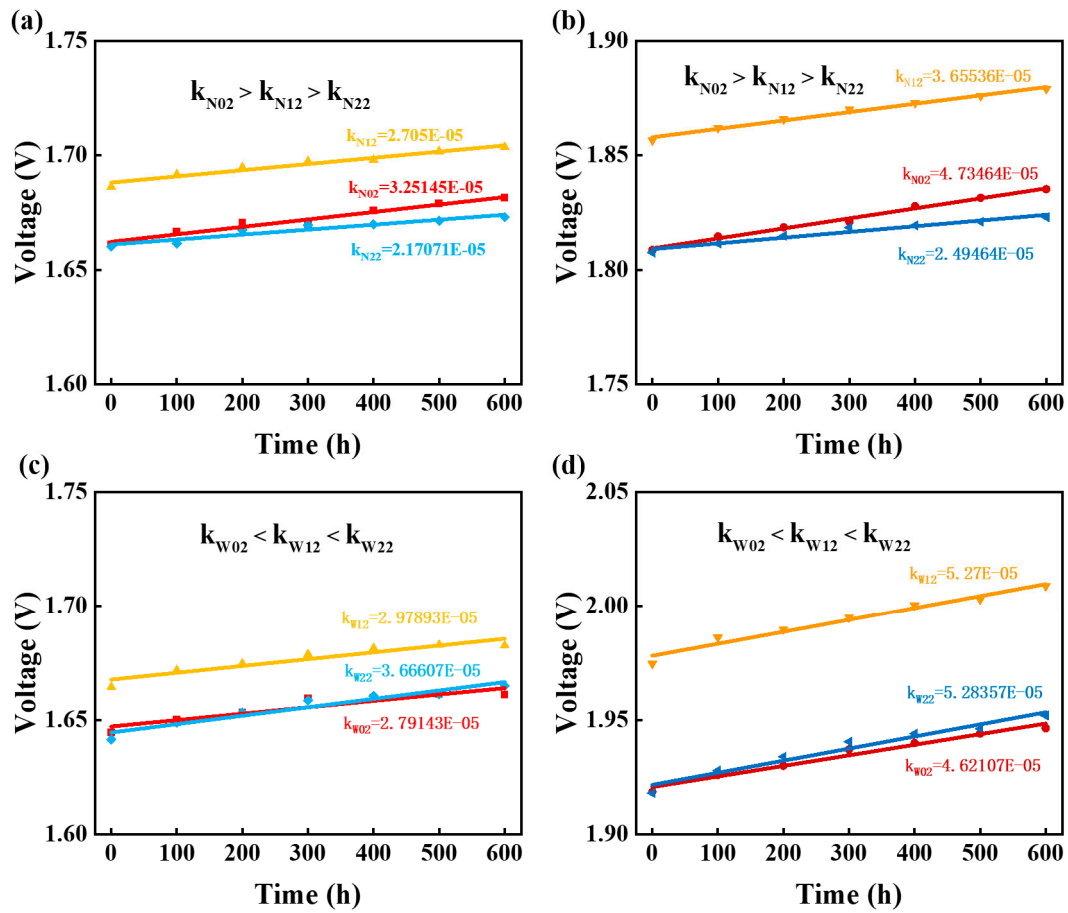

**Figure S3.** Degradation rate of narrow square wave mode in (a) 1 A/cm<sup>2</sup> and (b) 2 A/cm<sup>2</sup>, and degradation rate in (c) 1 A/cm<sup>2</sup> and (d) 3 A/cm<sup>2</sup> for wide square wave mode, the slope  $k$  represents the degradation rate.

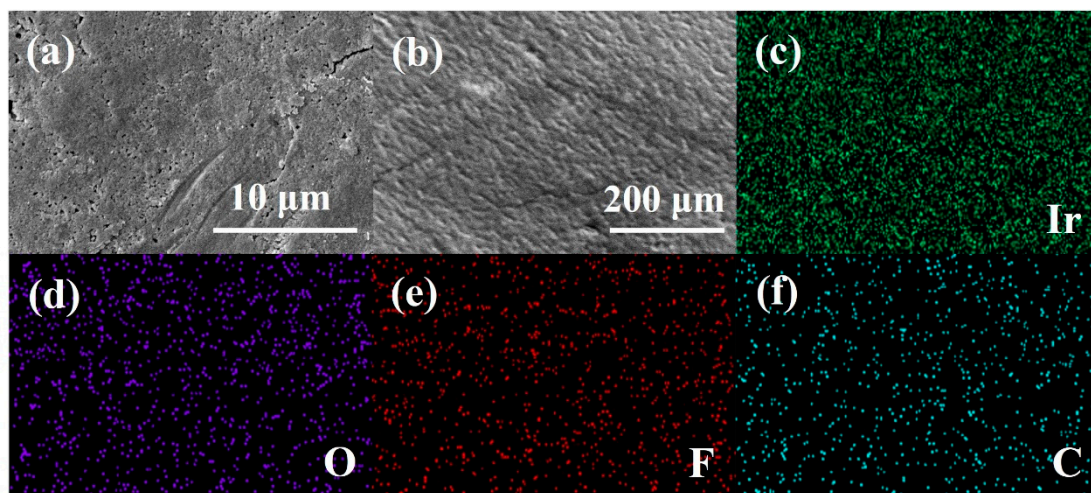

**Figure S4.** (a) High and (b) low magnification SEM images and (c–f) EDS mappings of the fresh MEA used in this investigation.

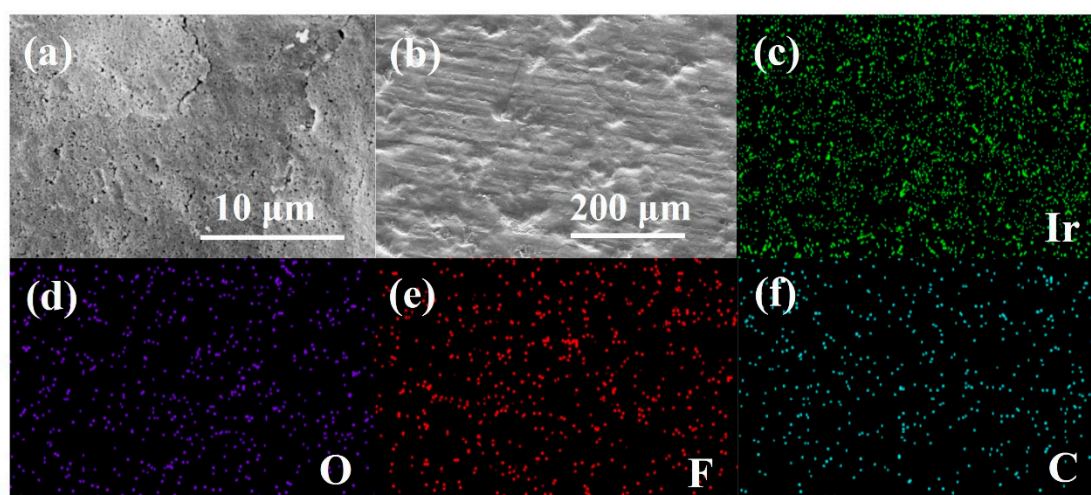

**Figure S5.** (a) High and (b) low magnification SEM images and (c–f) EDS mappings of the MEA after constant current mode AST C3.

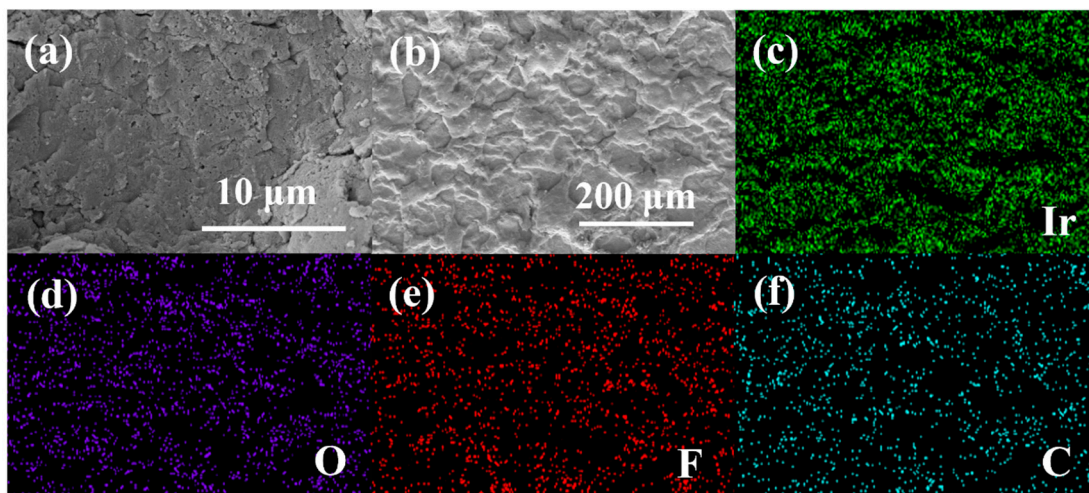

**Figure S6.** (a) High and (b) low magnification SEM images and (c–f) EDS mappings of the MEA after narrow square wave mode AST N02.

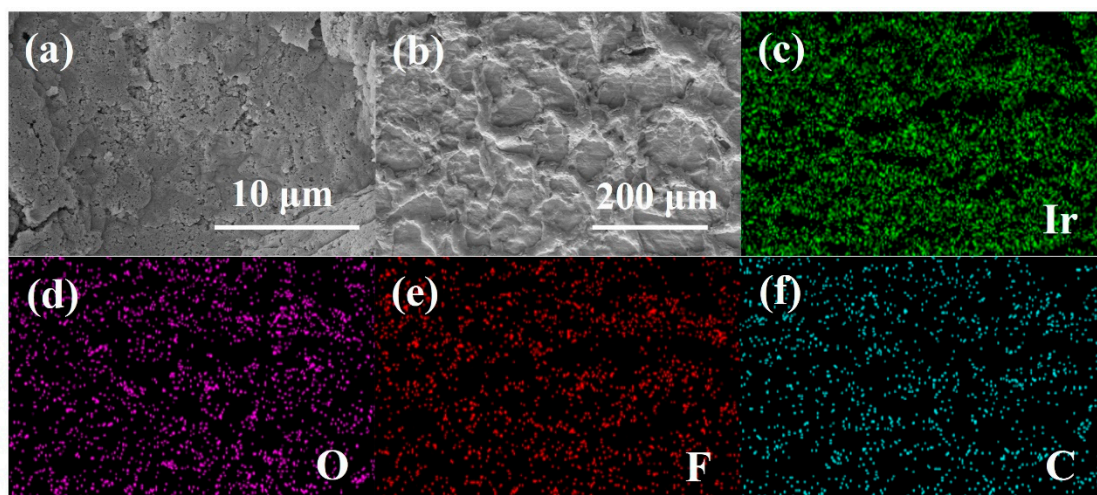

**Figure S7.** (a) High and (b) low magnification SEM images and (c–f) EDS mappings of the MEA after wide square wave mode AST W22.



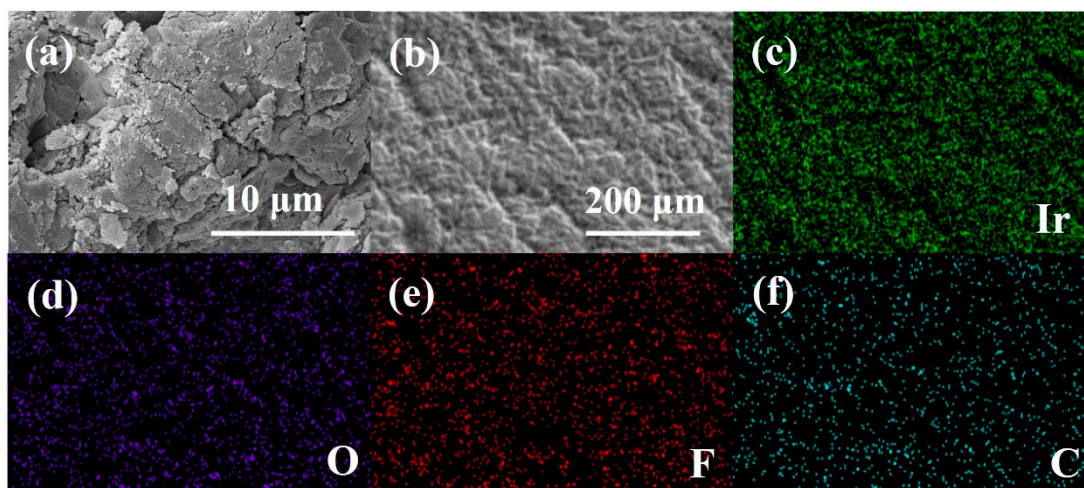

**Figure S8.** (a) High and (b) low magnification SEM images and (c–f) EDS mappings of the MEA after solar photovoltaic mode AST.

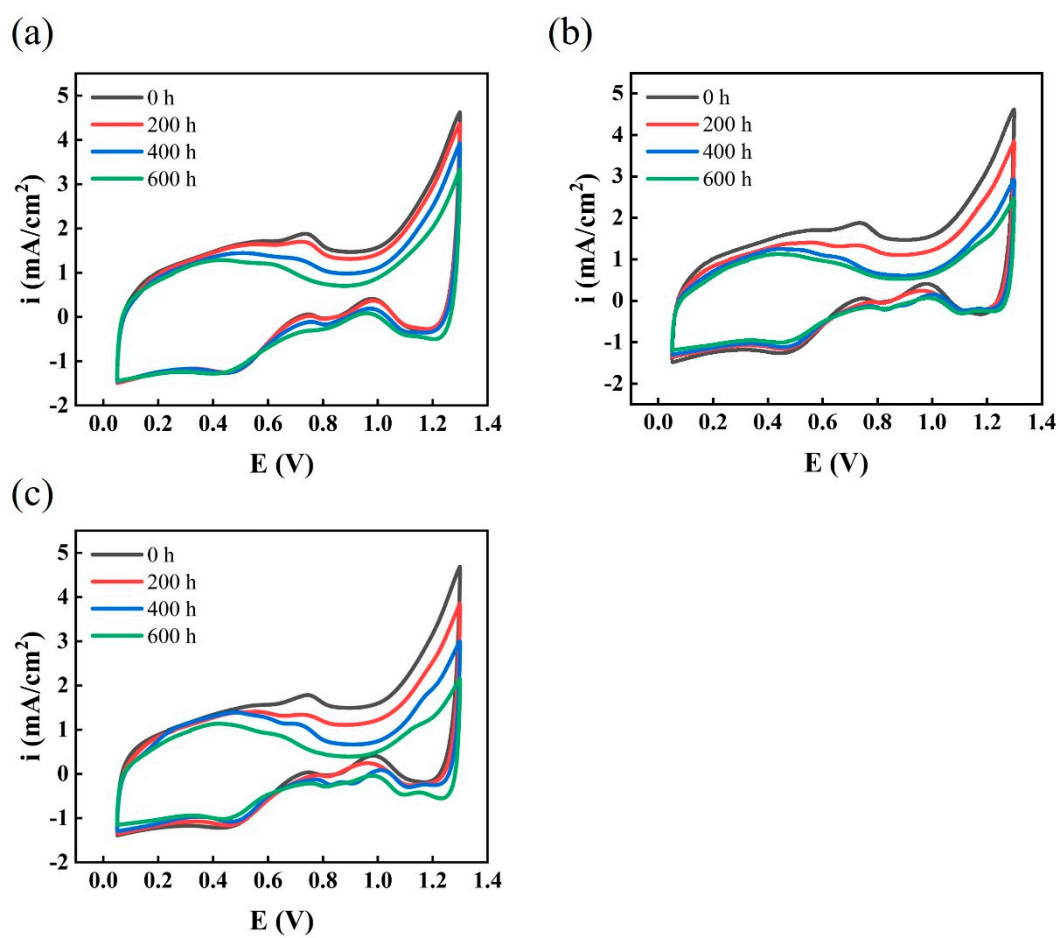

**Figure S9.** CV curves over time in (a) constant current density mode AST C3, (b) narrow square wave mode AST N02 and (c) wide square wave mode AST W22.

**Table S1.** Voltage at different times in constant current test.

|     | C1      | C2      | C3      |
|-----|---------|---------|---------|
| 0   | 1.66708 | 1.82256 | 2.01449 |
| 100 | 1.67477 | 1.81718 | 2.0088  |
| 200 | 1.67892 | 1.82071 | 2.01587 |
| 300 | 1.68    | 1.82287 | 2.01787 |
| 400 | 1.6803  | 1.82686 | 2.02618 |
| 500 | 1.68276 | 1.83179 | 2.03494 |
| 600 | 1.68246 | 1.83517 | 2.04032 |

**Table S2.** Voltage in 1 A/cm<sup>2</sup> and 2 A/cm<sup>2</sup> at different times in narrow square wave mode test.

|       | N02                 |                     | N12                 |                     | N22                 |                     |
|-------|---------------------|---------------------|---------------------|---------------------|---------------------|---------------------|
|       | 1 A/cm <sup>2</sup> | 2 A/cm <sup>2</sup> | 2 A/cm <sup>2</sup> | 2 A/cm <sup>2</sup> | 1 A/cm <sup>2</sup> | 2 A/cm <sup>2</sup> |
| 0 h   | 1.66098             | 1.80869             | 1.68623             | 1.85658             | 1.66017             | 1.80755             |
| 100 h | 1.66666             | 1.8146              | 1.69166             | 1.86198             | 1.66151             | 1.81154             |
| 200 h | 1.67063             | 1.81863             | 1.69478             | 1.86571             | 1.66741             | 1.81484             |
| 300 h | 1.66963             | 1.82093             | 1.69741             | 1.87011             | 1.66955             | 1.8185              |
| 400 h | 1.67583             | 1.82786             | 1.69802             | 1.87285             | 1.66988             | 1.81942             |
| 500 h | 1.67893             | 1.83142             | 1.70178             | 1.87591             | 1.67142             | 1.821               |
| 600 h | 1.68142             | 1.83523             | 1.70365             | 1.87903             | 1.673               | 1.823               |

**Table S3.** Voltage in 1 A/cm<sup>2</sup> and 3 A/cm<sup>2</sup> at different times in wide square wave mode test.

|       | W02                 |                     | W12                 |                     | W22                 |                     |
|-------|---------------------|---------------------|---------------------|---------------------|---------------------|---------------------|
|       | 1 A/cm <sup>2</sup> | 3 A/cm <sup>2</sup> | 1 A/cm <sup>2</sup> | 3 A/cm <sup>2</sup> | 1 A/cm <sup>2</sup> | 3 A/cm <sup>2</sup> |
| 0 h   | 1.64451             | 1.91857             | 1.66433             | 1.9745              | 1.64149             | 1.91807             |
| 100 h | 1.65002             | 1.926               | 1.6717              | 1.98602             | 1.64874             | 1.92792             |
| 200 h | 1.65314             | 1.92996             | 1.67462             | 1.98962             | 1.65319             | 1.93397             |
| 300 h | 1.65925             | 1.93709             | 1.67872             | 1.99491             | 1.65856             | 1.94049             |
| 400 h | 1.65955             | 1.9399              | 1.68141             | 2.00027             | 1.66052             | 1.94404             |
| 500 h | 1.66119             | 1.94404             | 1.68277             | 2.00295             | 1.66121             | 1.94611             |
| 600 h | 1.66098             | 1.94636             | 1.68249             | 2.00885             | 1.66495             | 1.9519              |

**Table S4.** Voltage at different times in Simulating solar fluctuation test.

|        | 1 A/cm <sup>2</sup> | 2 A/cm <sup>2</sup> | 3 A/cm <sup>2</sup> |
|--------|---------------------|---------------------|---------------------|
| 0 h    | 1.61046             | 1.7563              | 1.89586             |
| 110 h  | 1.64144             | 1.7932              | 1.94432             |
| 220 h  | 1.65357             | 1.80284             | 1.95093             |
| 330 h  | 1.64858             | 1.79669             | 1.95048             |
| 440 h  | 1.65149             | 1.79789             | 1.94821             |
| 550 h  | 1.65556             | 1.80401             | 1.96056             |
| 660 h  | 1.66163             | 1.81044             | 1.98249             |
| 770 h  | 1.6591              | 1.81003             | 1.99477             |
| 880 h  | 1.66591             | 1.81835             | 1.99363             |
| 990 h  | 1.67099             | 1.8294              | 2.00641             |
| 1100 h | 1.67564             | 1.83435             | 2.02057             |
| 1210 h | 1.67359             | 1.83267             | 2.0244              |
| 1320 h | 1.68765             | 1.85337             | 2.03804             |
| 1430 h | 1.68599             | 1.85088             | 2.03452             |
